# Supplementary material for: Stability of phosphinidenes—Are they synthetically accessible?
Source: Royal Society of Chemistry journal article supplement (doi:10.1039/b608276a), 2006-01-01
Supplement: b608276a.pdf [file b608276a.pdf]

## Stability of phosphinidenes – Are they synthetically accessible?

### *Supplementary material*

Authors: Zoltán Benkő, Rainer Streubel and László Nyulászi  
E-mail: nyulaszi@mail.bme.hu

*Total energies (E; in a.u.) and XYZ coordinates (in Å)*

#### H<sub>2</sub>C=N–P (1H) (Singlet) RB3LYP/aug-cc-pVTZ

E= – 435.4235076

|   |           |           |          |
|---|-----------|-----------|----------|
| P | 0.000000  | -1.147472 | 0.000000 |
| N | 0.000000  | 0.393784  | 0.000000 |
| C | 0.000000  | 1.671348  | 0.000000 |
| H | -0.936934 | 2.213785  | 0.000000 |
| H | 0.936934  | 2.213785  | 0.000000 |

#### H<sub>2</sub>C=N–P (1H) Triplet UB3LYP/aug-cc-pVTZ

E= – 434.4027065

|   |           |           |          |
|---|-----------|-----------|----------|
| P | -0.724268 | -0.854818 | 0.000000 |
| N | 0.000000  | 0.631997  | 0.000000 |
| C | 1.223824  | 1.004777  | 0.000000 |
| H | 2.061674  | 0.302794  | 0.000000 |
| H | 1.459412  | 2.066841  | 0.000000 |

#### H<sub>2</sub>C=N–P (1H) (Singlet) RHF/aug-cc-pVTZ

E= – 434.1937299

|   |           |           |          |
|---|-----------|-----------|----------|
| C | 0.000036  | 1.648281  | 0.000000 |
| N | 0.000000  | 0.400682  | 0.000000 |
| P | -0.000021 | -1.138838 | 0.000000 |
| H | -0.927222 | 2.194083  | 0.000000 |
| H | 0.927328  | 2.194037  | 0.000000 |

**H<sub>2</sub>C=N-P (1H) Singlet UHF/aug-cc-pVTZ**

E= - 434.2043557

|   |           |          |           |
|---|-----------|----------|-----------|
| P | 0.650227  | 0.000000 | 0.901620  |
| N | -0.648464 | 0.000000 | -0.159091 |
| C | -0.647743 | 0.000000 | -1.407074 |
| H | 0.255106  | 0.000000 | -2.008294 |
| H | -1.583974 | 0.000000 | -1.945504 |

**H<sub>2</sub>C=N-P (1H) Triplet UHF/aug-cc-pVTZ**

E= - 434.2229083

|   |           |           |          |
|---|-----------|-----------|----------|
| P | -0.746412 | -0.804927 | 0.000000 |
| N | 0.000000  | 0.683848  | 0.000000 |
| C | 1.261410  | 0.884664  | 0.000000 |
| H | 1.990507  | 0.084420  | 0.000000 |
| H | 1.637220  | 1.894568  | 0.000000 |

*Geometries optimized with 6-31G\* basis set (in Å and degree) and singlet-triplet gaps (in kcal/mol) calculated with different functionals*

| Method  | $^1S (C_{2v})$ |        |        |                         |                                      | $^3T(C_s)$ |        |         |           |           |            |            | $E(^3T-^1S)$ |             |
|---------|----------------|--------|--------|-------------------------|--------------------------------------|------------|--------|---------|-----------|-----------|------------|------------|--------------|-------------|
|         | CN (Å)         | NP (Å) | CH (Å) | H <sup>1</sup> CN (deg) | H <sup>1</sup> CH <sup>2</sup> (deg) | CN (Å)     | NP (Å) | CH1 (Å) | CH2 (deg) | CNP (deg) | H1CN (deg) | H2CN (deg) | 6-31G*       | Aug-cc-pVTZ |
| B3LYP   | 1,280          | 1,550  | 1,087  | 120,1                   | 119,8                                | 1,285      | 1,666  | 1,098   | 1,093     | 132,0     | 123,8      | 119,3      | 12,8         | 13,1        |
| B3P86   | 1,278          | 1,544  | 1,087  | 120,0                   | 120,0                                | 1,283      | 1,659  | 1,097   | 1,092     | 131,3     | 123,7      | 119,2      | 12,8         | 12,8        |
| B3PW91  | 1,278          | 1,545  | 1,087  | 120,0                   | 120,0                                | 1,284      | 1,662  | 1,099   | 1,093     | 131,1     | 123,9      | 119,2      | 12,0         | 12,0        |
| BLYP    | 1,279          | 1,549  | 1,086  | 120,1                   | 119,8                                | 1,284      | 1,668  | 1,097   | 1,092     | 131,3     | 123,8      | 119,3      | 11,0         | 11,4        |
| BP86    | 1,291          | 1,559  | 1,096  | 120,0                   | 120,0                                | 1,297      | 1,670  | 1,108   | 1,102     | 133,0     | 123,8      | 119,0      | 17,0         | 17,0        |
| BPW91   | 1,290          | 1,558  | 1,094  | 120,0                   | 120,0                                | 1,295      | 1,671  | 1,105   | 1,100     | 132,8     | 123,9      | 118,9      | 16,2         | 16,3        |
| G96LYP  | 1,293          | 1,561  | 1,094  | 120,1                   | 119,8                                | 1,297      | 1,671  | 1,106   | 1,100     | 134,1     | 123,8      | 119,2      | 17,1         | 17,2        |
| MPW1PW1 | 1,275          | 1,543  | 1,086  | 120,0                   | 120,0                                | 1,282      | 1,661  | 1,096   | 1,091     | 130,4     | 123,9      | 119,1      | 10,4         | 10,3        |
| PBE1PBE | 1,276          | 1,543  | 1,087  | 120,0                   | 120,0                                | 1,282      | 1,662  | 1,098   | 1,093     | 130,2     | 123,9      | 119,2      | 10,5         | 10,4        |
| MPW1K   | 1,266          | 1,535  | 1,081  | 120,0                   | 120,0                                | 1,274      | 1,656  | 1,090   | 1,085     | 128,9     | 123,8      | 119,2      | 5,9          | 5,6         |

**H<sub>2</sub>C=N-P (1H) B3LYP/6-311+G\*\***

E= - 435.4068347

|   |           |           |          |
|---|-----------|-----------|----------|
| P | 0.000000  | -1.149876 | 0.000000 |
| N | 0.000000  | 0.393876  | 0.000000 |
| C | 0.000000  | 1.675720  | 0.000000 |
| H | -0.939447 | 2.218348  | 0.000000 |
| H | 0.939447  | 2.218348  | 0.000000 |

**[(H<sub>2</sub>CNP)<sub>2</sub>] (2H) B3LYP/6-311+G\*\***

E= - 870.8692328

|   |           |           |           |
|---|-----------|-----------|-----------|
| P | -0.511312 | 0.889630  | 0.168535  |
| P | 0.511211  | -0.889483 | -0.168608 |
| N | -2.087828 | 0.450378  | -0.316996 |
| N | 2.087712  | -0.450380 | 0.316988  |
| C | -2.830972 | -0.476390 | 0.126409  |
| C | 2.831220  | 0.476145  | -0.126280 |
| H | -2.539985 | -1.152726 | 0.941105  |
| H | 2.540611  | 1.152560  | -0.941043 |
| H | -3.818491 | -0.625040 | -0.313278 |
| H | 3.818704  | 0.624500  | 0.313592  |

**[(H<sub>2</sub>CNP)<sub>2</sub>] (3H) B3LYP/6-311+G\*\***

E= - 870.8428218

|   |           |           |          |
|---|-----------|-----------|----------|
| P | -1.379508 | 0.000000  | 0.000000 |
| P | 1.379508  | 0.000000  | 0.000000 |
| N | 0.000000  | 1.139395  | 0.000000 |
| N | 0.000000  | -1.139395 | 0.000000 |
| C | 0.000000  | 2.435440  | 0.000000 |
| C | 0.000000  | -2.435440 | 0.000000 |
| H | 0.937087  | 2.979091  | 0.000000 |
| H | -0.937087 | 2.979091  | 0.000000 |
| H | 0.937087  | -2.979091 | 0.000000 |
| H | -0.937087 | -2.979091 | 0.000000 |

**[(H<sub>2</sub>CNP)<sub>2</sub>] (4H) B3LYP/6-311+G\*\***

E= - 870.8684003

|   |           |           |           |
|---|-----------|-----------|-----------|
| P | 1.678678  | 0.016950  | -0.248156 |
| P | -1.678680 | -0.016952 | -0.248157 |
| N | 0.771755  | 1.303495  | -0.113707 |
| N | -0.771758 | -1.303492 | -0.113703 |
| C | -0.552383 | 1.362122  | 0.447548  |
| C | 0.552391  | -1.362116 | 0.447546  |
| H | 0.995484  | -2.350345 | 0.302893  |
| H | 0.528998  | -1.161548 | 1.530095  |
| H | -0.995476 | 2.350353  | 0.302915  |
| H | -0.529005 | 1.161517  | 1.530090  |

**[(H<sub>2</sub>CNP)<sub>3</sub>] (5H) B3LYP/6-311+G\*\***

E= - 1306.3265534

|   |           |           |           |
|---|-----------|-----------|-----------|
| P | -0.043385 | -1.266932 | 0.704168  |
| P | -0.298665 | 1.018122  | 0.765859  |
| P | 1.097402  | 0.013881  | -0.718861 |
| N | 2.539916  | 0.160454  | 0.289530  |
| N | -1.628848 | 1.231100  | -0.372279 |
| N | -1.196324 | -1.952777 | -0.390893 |
| C | 3.662141  | 0.245160  | -0.297176 |
| C | -2.287938 | 2.315193  | -0.307673 |
| C | -2.450045 | -1.774708 | -0.331385 |
| H | 4.566216  | 0.337661  | 0.307969  |
| H | 3.801085  | 0.231680  | -1.387405 |
| H | -2.084135 | 3.130551  | 0.400573  |
| H | -3.119724 | 2.467060  | -0.998883 |
| H | -3.089779 | -2.350022 | -1.004269 |
| H | -2.952102 | -1.078322 | 0.347416  |

**C<sub>2</sub>H<sub>2</sub>C=N-P (6) B3LYP/6-311+G\*\***

E= - 511.5273961

|   |          |           |           |
|---|----------|-----------|-----------|
| P | 0.000000 | 0.000000  | 2.067357  |
| N | 0.000000 | 0.000000  | 0.485969  |
| C | 0.000000 | 0.000000  | -0.763665 |
| C | 0.000000 | 0.660943  | -2.048488 |
| C | 0.000000 | -0.660943 | -2.048488 |
| H | 0.000000 | 1.573469  | -2.624145 |
| H | 0.000000 | -1.573469 | -2.624145 |

**(C<sub>4</sub>H<sub>4</sub>)C=N-P (7) B3LYP/6-311+G\*\***

E= - 589.06083

|   |           |           |          |
|---|-----------|-----------|----------|
| P | -0.000503 | -2.677169 | 0.000000 |
| N | -0.000263 | -1.150131 | 0.000000 |
| C | 0.729159  | 2.295702  | 0.000000 |
| C | -0.729159 | 2.295702  | 0.000000 |
| C | -1.177373 | 1.007549  | 0.000000 |
| C | 1.177373  | 1.007549  | 0.000000 |
| C | 0.000000  | 0.151051  | 0.000000 |
| H | -2.196303 | 0.651009  | 0.000000 |
| H | 2.196303  | 0.651009  | 0.000000 |
| H | -1.349179 | 3.181961  | 0.000000 |
| H | 1.349179  | 3.181361  | 0.000000 |

**F<sub>2</sub>=N-P (1F) B3LYP/6-311+G\*\***

E= - 633.9319586

|   |           |           |          |
|---|-----------|-----------|----------|
| P | -0.000007 | 2.006193  | 0.000000 |
| F | -1.093298 | -1.567546 | 0.000000 |
| F | 1.093298  | -1.567546 | 0.000000 |
| N | 0.000000  | 0.430524  | 0.000000 |
| C | 0.000003  | -0.815130 | 0.000000 |

**(NC)<sub>2</sub>C=N-P (1CN) B3LYP/6-311+G\*\***

E= - 619.9333847

|   |           |           |          |
|---|-----------|-----------|----------|
| P | 0.000000  | 2.360673  | 0.000000 |
| N | 0.000000  | 0.842665  | 0.000000 |
| N | 2.242840  | -1.741516 | 0.000000 |
| N | -2.242840 | -1.741516 | 0.000000 |
| C | -1.233900 | -1.174448 | 0.000000 |
| C | 1.233900  | -1.174448 | 0.000000 |
| C | 0.000000  | -0.472359 | 0.000000 |

**(H<sub>3</sub>Si)<sub>2</sub>C=N-P (1SiH<sub>3</sub>) B3LYP/6-311+G\*\***

E= - 1016.8628334

|    |           |           |           |
|----|-----------|-----------|-----------|
| P  | 0.000000  | 0.000000  | 2.498228  |
| Si | 0.000000  | 1.669631  | -1.200424 |
| Si | 0.000000  | -1.669631 | -1.200424 |
| N  | 0.000000  | 0.000000  | 0.960344  |
| C  | 0.000000  | 0.000000  | -0.333242 |
| H  | -1.301587 | -2.365538 | -1.009155 |
| H  | 0.232562  | -1.452609 | -2.648914 |
| H  | 1.073129  | -2.529490 | -0.634187 |
| H  | 1.301587  | 2.365538  | -1.009155 |
| H  | -0.232562 | 1.452609  | -2.648914 |
| H  | -1.073129 | 2.529490  | -0.634187 |

**(Me<sub>3</sub>Si)<sub>2</sub>C=N-P (1SiMe<sub>3</sub>) B3LYP/6-311+G\*\***

E= - 1252.9017139

|    |           |           |           |
|----|-----------|-----------|-----------|
| P  | 0.000448  | 3.163262  | -0.000022 |
| Si | -1.694848 | -0.540242 | 0.001262  |
| Si | 1.694728  | -0.540202 | -0.001260 |
| N  | 0.000208  | 1.617699  | -0.000287 |
| C  | -2.099248 | -1.157310 | -1.739135 |
| C  | -1.656841 | -2.008091 | 1.191457  |
| C  | 0.000007  | 0.329998  | -0.000557 |
| C  | 2.101085  | -1.150534 | 1.741024  |
| C  | 3.007619  | 0.689607  | -0.563014 |
| C  | 1.654807  | -2.013267 | -1.185439 |
| C  | -3.008124 | 0.692667  | 0.555885  |
| H  | -3.085917 | -1.632670 | -1.759067 |
| H  | -2.111907 | -0.330390 | -2.454953 |
| H  | -1.368633 | -1.891012 | -2.089872 |
| H  | -3.987660 | 0.205744  | 0.598538  |
| H  | -2.790072 | 1.093975  | 1.549642  |
| H  | -3.089432 | 1.536695  | -0.134411 |
| H  | -2.627141 | -2.515637 | 1.187908  |
| H  | -0.901450 | -2.748748 | 0.915287  |
| H  | -1.452994 | -1.685792 | 2.216263  |
| H  | 2.625338  | -2.520367 | -1.181596 |
| H  | 0.900300  | -2.753067 | -0.904624 |
| H  | 1.448858  | -1.695452 | -2.211224 |
| H  | 3.987176  | 0.202536  | -0.603526 |
| H  | 2.789022  | 1.085548  | -1.558801 |
| H  | 3.089240  | 1.537346  | 0.122676  |
| H  | 3.087922  | -1.625494 | 1.762053  |
| H  | 2.114054  | -0.320740 | 2.453507  |
| H  | 1.370960  | -1.883049 | 2.095303  |

**(C<sub>4</sub>H<sub>3</sub>P<sup>2</sup>)C=N-P (7P<sup>a</sup>) B3LYP/6-311+G\*\***

E= - 891.7269965

|   |           |           |          |
|---|-----------|-----------|----------|
| P | -0.622036 | -1.546453 | 0.000000 |
| P | 2.752742  | 0.824378  | 0.000000 |
| N | 1.264893  | 0.498266  | 0.000000 |
| C | 0.000000  | 0.189467  | 0.000000 |
| C | -1.076703 | 1.139845  | 0.000000 |
| C | -2.299489 | 0.517801  | 0.000000 |
| C | -2.218090 | -0.910546 | 0.000000 |
| H | -0.909591 | 2.209045  | 0.000000 |
| H | -3.240180 | 1.055482  | 0.000000 |
| H | -3.099369 | -1.540657 | 0.000000 |

**(C<sub>4</sub>H<sub>3</sub>P<sup>3</sup>)C=N-P (7P<sup>b</sup>) B3LYP/6-311+G\*\***

E= - 891.7237836

|   |           |           |          |
|---|-----------|-----------|----------|
| P | 0.299809  | -2.403670 | 0.000000 |
| P | -1.230744 | 2.750700  | 0.000000 |
| N | -0.561004 | 1.383643  | 0.000000 |
| C | 0.000000  | 0.197292  | 0.000000 |
| C | 1.438481  | -0.001284 | 0.000000 |
| C | 1.760420  | -1.320645 | 0.000000 |
| C | -0.733405 | -1.036639 | 0.000000 |
| H | 2.134484  | 0.828548  | 0.000000 |
| H | -1.814376 | -1.061246 | 0.000000 |
| H | 2.777965  | -1.690607 | 0.000000 |

**(C<sub>4</sub>H<sub>3</sub>N<sup>2</sup>)C=N-P (7N<sup>a</sup>) B3LYP/6-311+G\*\***

E= - 605.1135225

|   |           |           |          |
|---|-----------|-----------|----------|
| P | -0.282456 | -2.629870 | 0.000000 |
| N | 1.265879  | 0.763534  | 0.000000 |
| N | -0.159595 | -1.114312 | 0.000000 |
| C | 0.000000  | 0.181982  | 0.000000 |
| C | -1.045064 | 1.180119  | 0.000000 |
| C | -0.385572 | 2.377692  | 0.000000 |
| C | 1.026565  | 2.057142  | 0.000000 |
| H | -2.106936 | 0.986679  | 0.000000 |
| H | -0.819989 | 3.366931  | 0.000000 |
| H | 1.844210  | 2.768277  | 0.000000 |



**(C<sub>4</sub>H<sub>3</sub>N<sup>3</sup>)C=N-P (7N<sup>β</sup>) B3LYP/6-311+G\*\***

E= - 605.1078032

|   |           |           |          |
|---|-----------|-----------|----------|
| P | -0.613591 | -2.593748 | 0.000000 |
| N | -0.292787 | -1.105036 | 0.000000 |
| N | 1.290333  | 2.037088  | 0.000000 |
| C | 0.000000  | 0.163951  | 0.000000 |
| C | -0.894843 | 1.299451  | 0.000000 |
| C | -0.070421 | 2.386629  | 0.000000 |
| C | 1.344814  | 0.735961  | 0.000000 |
| H | -1.973022 | 1.263843  | 0.000000 |
| H | 2.269375  | 0.172302  | 0.000000 |
| H | -0.352611 | 3.429754  | 0.000000 |

**[(H<sub>3</sub>Si)<sub>2</sub>CNP)<sub>2</sub>] (2SiH<sub>3</sub>) B3LYP/6-311+G\*\***

E= - 2033.7404062

|    |           |           |           |
|----|-----------|-----------|-----------|
| P  | -0.369949 | -0.532587 | -0.834874 |
| P  | 0.369972  | 0.532528  | 0.835030  |
| Si | -3.175081 | 1.855289  | -0.126764 |
| Si | 3.175121  | -1.855286 | 0.126690  |
| Si | -4.593559 | -1.111605 | 0.238558  |
| Si | 4.593495  | 1.111662  | -0.238665 |
| N  | -1.978722 | -0.730835 | -0.430263 |
| N  | 1.978734  | 0.730803  | 0.430382  |
| C  | -3.031181 | -0.066214 | -0.126567 |
| C  | 3.031185  | 0.066215  | 0.126581  |
| H  | 4.563465  | -2.159479 | 0.561534  |
| H  | 2.199547  | -2.437600 | 1.079222  |
| H  | 2.978595  | -2.420123 | -1.231180 |
| H  | 5.473212  | 1.098871  | 0.960168  |
| H  | 5.337391  | 0.490127  | -1.366392 |
| H  | 4.199593  | 2.498882  | -0.575526 |
| H  | -4.563381 | 2.159481  | -0.561749 |
| H  | -2.978676 | 2.420176  | 1.231103  |
| H  | -2.199413 | 2.437555  | -1.079229 |
| H  | -5.337443 | -0.490111 | 1.366315  |
| H  | -5.473254 | -1.098657 | -0.960290 |
| H  | -4.199750 | -2.498876 | 0.575310  |

**[(H<sub>3</sub>Si)<sub>2</sub>CNP]<sub>2</sub> (3SiH<sub>3</sub>) B3LYP/6-311+G\*\***

E= - 2033.7289184

|    |           |           |           |
|----|-----------|-----------|-----------|
| P  | 0.000033  | -1.377020 | -0.000039 |
| P  | -0.000032 | 1.377019  | -0.000040 |
| Si | 3.411748  | 1.630551  | 0.087431  |
| Si | 3.411726  | -1.630554 | -0.087371 |
| Si | -3.411726 | 1.630553  | -0.087371 |
| Si | -3.411749 | -1.630550 | 0.087431  |
| N  | 1.141439  | 0.000007  | -0.000038 |
| N  | -1.141439 | -0.000007 | -0.000038 |
| C  | 2.461973  | 0.000010  | -0.000048 |
| C  | -2.461972 | -0.000010 | -0.000048 |
| H  | 3.684433  | -1.998918 | -1.501123 |
| H  | 4.704527  | -1.450511 | 0.618873  |
| H  | 2.619432  | -2.707568 | 0.560033  |
| H  | 4.704148  | 1.450893  | -0.619633 |
| H  | 2.619020  | 2.707806  | -0.559032 |
| H  | 3.685294  | 1.998267  | 1.501191  |
| H  | -4.704143 | -1.450895 | -0.619646 |
| H  | -2.619016 | -2.707808 | -0.559020 |
| H  | -3.685309 | -1.998259 | 1.501190  |
| H  | -3.684450 | 1.998907  | -1.501122 |
| H  | -4.704520 | 1.450515  | 0.618889  |
| H  | -2.619424 | 2.707571  | 0.560017  |

**[(H<sub>3</sub>Si)<sub>2</sub>CNP]<sub>2</sub> (4SiH<sub>3</sub>) B3LYP/6-311+G\*\***

E= - 2033.7458411

|    |           |           |           |
|----|-----------|-----------|-----------|
| P  | -0.649482 | -0.406638 | 1.583933  |
| P  | 0.649482  | -0.406638 | -1.583933 |
| Si | -2.288399 | 1.739766  | -0.068251 |
| Si | 2.288398  | 1.739767  | 0.068251  |
| Si | -3.143097 | -1.247184 | -0.090353 |
| Si | 3.143098  | -1.247183 | 0.090353  |
| N  | 0.884391  | -0.344566 | 1.223125  |
| N  | -0.884391 | -0.344566 | -1.223125 |
| C  | -1.621383 | -0.052901 | -0.013335 |
| C  | 1.621383  | -0.052901 | 0.013335  |
| H  | -4.004823 | -1.057785 | 1.107263  |
| H  | -3.919435 | -0.954713 | -1.316926 |
| H  | -2.641918 | -2.642921 | -0.114067 |
| H  | -3.066356 | 1.985363  | 1.173258  |
| H  | -1.158610 | 2.694856  | -0.149767 |
| H  | -3.167889 | 1.907973  | -1.250793 |
| H  | 3.167885  | 1.907975  | 1.250796  |
| H  | 3.066359  | 1.985362  | -1.173256 |
| H  | 1.158609  | 2.694856  | 0.149762  |

|   |          |           |           |
|---|----------|-----------|-----------|
| H | 3.919438 | -0.954710 | 1.316924  |
| H | 2.641920 | -2.642921 | 0.114070  |
| H | 4.004822 | -1.057786 | -1.107265 |

**[(H<sub>3</sub>Si)<sub>2</sub>CNP]<sub>3</sub> (5SiH<sub>3</sub>) B3LYP/6-311+G\*\***

E= - 3050.6306722

|    |           |           |           |
|----|-----------|-----------|-----------|
| P  | -1.229758 | -0.239498 | 0.437102  |
| P  | 0.050993  | -1.821769 | -0.519612 |
| P  | -0.043352 | 0.237437  | -1.447670 |
| Si | 3.482942  | -1.745193 | -1.351477 |
| Si | -5.370187 | -0.903084 | -0.976048 |
| Si | 3.290706  | 2.787742  | -0.000147 |
| Si | 0.063319  | 3.389281  | 0.055208  |
| Si | 3.690007  | -1.862589 | 1.949988  |
| Si | -4.209270 | 0.423723  | 1.820284  |
| N  | -2.723012 | -0.645696 | -0.422900 |
| N  | 1.357898  | -1.756353 | 0.635271  |
| N  | 1.413623  | 0.987934  | -0.830140 |
| C  | -3.871944 | -0.392747 | 0.099174  |
| C  | 2.613731  | -1.763225 | 0.361309  |
| C  | 1.507268  | 2.172220  | -0.336605 |
| H  | 4.532274  | -0.698596 | -1.342059 |
| H  | 4.151298  | -3.068404 | -1.491460 |
| H  | 2.543968  | -1.548178 | -2.479416 |
| H  | 5.131510  | -1.940914 | 1.589073  |
| H  | 3.461090  | -0.644986 | 2.766930  |
| H  | 3.310269  | -3.070499 | 2.722134  |
| H  | 0.626083  | 4.762050  | -0.017002 |
| H  | -1.036209 | 3.242668  | -0.929693 |
| H  | -0.438526 | 3.142410  | 1.429184  |
| H  | 3.309535  | 3.531492  | 1.287469  |
| H  | 4.228818  | 1.643998  | 0.048561  |
| H  | 3.678565  | 3.728103  | -1.084845 |
| H  | -6.210119 | -1.862330 | -0.209004 |
| H  | -6.196942 | 0.303034  | -1.252543 |
| H  | -4.900166 | -1.513940 | -2.239818 |
| H  | -5.683053 | 0.506816  | 1.981713  |
| H  | -3.640497 | -0.404284 | 2.912863  |
| H  | -3.635262 | 1.792019  | 1.872425  |

**H<sub>3</sub>Si-P-N-C-SiH<sub>3</sub> (8SiH<sub>3</sub>) B3LYP/6-311+G\*\***

E= - 1016.8600574

|    |           |           |           |
|----|-----------|-----------|-----------|
| P  | -1.398508 | -1.147449 | 0.000011  |
| Si | -2.397347 | 0.885090  | 0.000001  |
| Si | 3.069003  | 0.311000  | 0.000009  |
| N  | 0.173994  | -0.524610 | -0.000016 |
| C  | 1.304198  | -0.200901 | -0.000034 |
| H  | -2.063483 | 1.700318  | -1.201136 |
| H  | -3.856371 | 0.600489  | 0.000107  |
| H  | -2.063313 | 1.700400  | 1.201034  |
| H  | 3.062795  | 1.789983  | -0.001177 |
| H  | 3.725571  | -0.222520 | 1.215251  |
| H  | 3.726104  | -0.224523 | -1.214064 |

**(H<sub>3</sub>Si)<sub>2</sub>P-N-C (9SiH<sub>3</sub>) B3LYP/6-311+G\*\***

E= - 1016.8695868

|    |           |           |           |
|----|-----------|-----------|-----------|
| P  | 0.000001  | 0.157996  | -0.842986 |
| Si | -1.753994 | -0.851155 | 0.235198  |
| Si | 1.753793  | -0.851528 | 0.235182  |
| N  | 0.000142  | 1.652401  | 0.043568  |
| C  | 0.000425  | 2.724513  | 0.532951  |
| H  | 1.583582  | -0.859098 | 1.708264  |
| H  | 1.794070  | -2.240601 | -0.287306 |
| H  | 2.987275  | -0.124115 | -0.142600 |
| H  | -1.794566 | -2.240227 | -0.287266 |
| H  | -1.583780 | -0.858735 | 1.708280  |
| H  | -2.987326 | -0.123489 | -0.142587 |

*Isodesmic reaction energies (in kcal/mol) at different levels of theory*

|                                                     | R-PCl <sub>2</sub> + H-P → R-P + H-PCl <sub>2</sub> |                     |                                         | R-PH <sub>2</sub> + H-P → R-P + H-PH <sub>2</sub> |                     |                                         |
|-----------------------------------------------------|-----------------------------------------------------|---------------------|-----------------------------------------|---------------------------------------------------|---------------------|-----------------------------------------|
|                                                     | B3LYP/<br>3-21G(*)                                  | B3LYP/<br>6-311+G** | MP2/<br>6-31G*//<br>B3LYP/<br>6-311+G** | B3LYP/<br>3-21G(*)                                | B3LYP/<br>6-311+G** | MP2/<br>6-31G*//<br>B3LYP/<br>6-311+G** |
| H-P                                                 | 0,0                                                 | 0,0                 | 0,0                                     | 0,0                                               | 0,0                 | 0,0                                     |
| F-P                                                 | 3,9                                                 | 1,4                 | 4,3                                     | -14,5                                             | -11,3               | -12,0                                   |
| Cl-P                                                | -10,9                                               | -10,0               | -9,0                                    | -17,5                                             | -15,5               | -15,6                                   |
| Br-P                                                | -13,4                                               | -12,6               | -11,3                                   | -20,0                                             | -17,0               | -16,7                                   |
| HO-P                                                | -12,0                                               | -11,1               | -10,6                                   | -28,7                                             | -23,6               | -25,1                                   |
| HS-P                                                | -31,8                                               | -29,4               | -28,6                                   | -37,1                                             | -34,1               | -34,3                                   |
| H <sub>2</sub> N-P                                  | -27,7                                               | -26,3               | -26,6                                   | -45,0                                             | -40,2               | -42,1                                   |
| F <sub>2</sub> N-P                                  | -45,1                                               | -44,4               | -38,4                                   | -50,7                                             | -46,4               | -43,4                                   |
| (C <sub>4</sub> H <sub>4</sub> N)-P                 | -23,6                                               | -23,2               | -21,0                                   | -33,0                                             | -30,8               | -30,8                                   |
| H <sub>2</sub> P-P                                  | -36,0                                               | -33,6               | -37,3                                   | -39,0                                             | -36,0               | -40,0                                   |
| F <sub>2</sub> P-P                                  | -42,8                                               | -33,8               | -40,8                                   | -44,9                                             | -33,5               | -42,6                                   |
| CH <sub>2</sub> =P-P                                | -34,1                                               | -31,2               | -33,3                                   | -35,6                                             | -32,2               | -35,2                                   |
| F <sub>2</sub> B-P                                  | -16,4                                               | -18,0               | -15,4                                   | -11,9                                             | -12,6               | -11,1                                   |
| H <sub>3</sub> C-P                                  | 1,3                                                 | 0,4                 | 2,7                                     | -6,9                                              | -7,3                | -6,0                                    |
| Ph-P                                                | -11,4                                               | -11,5               | -7,8                                    | -18,6                                             | -18,2               | -16,6                                   |
| HC≡CP                                               | -22,2                                               | -22,4               | -15,4                                   | -25,0                                             | -24,3               | -19,1                                   |
| H <sub>2</sub> C=N-P                                | -52,0                                               | -46,9               | -44,3                                   | -65,7                                             | -58,0               | -56,6                                   |
| F <sub>2</sub> C=N-P                                | -34,5                                               | -31,7               | -26,1                                   | -44,3                                             | -37,8               | -33,6                                   |
| (NC) <sub>2</sub> C=N-P                             | -66,7                                               | -63,9               | -64,2                                   | -71,0                                             | -64,9               | -67,4                                   |
| (H <sub>3</sub> Si) <sub>2</sub> C=N-P              | -66,4                                               | -61,7               | -66,5                                   | -79,8                                             | -71,5               | -76,7                                   |
| (C <sub>3</sub> H <sub>2</sub> )=N-P                | -32,9                                               | -26,1               | -22,5                                   | -51,8                                             | -40,1               | -39,9                                   |
| (C <sub>5</sub> H <sub>4</sub> )=N-P                | -62,2                                               | -58,2               | -59,8                                   | -74,6                                             | -67,6               | -69,9                                   |
| (C <sub>4</sub> H <sub>3</sub> P <sup>2</sup> )=N-P | -69,5                                               | -64,8               | -69,0                                   | -80,6                                             | -72,9               | -77,8                                   |
| (C <sub>4</sub> H <sub>3</sub> P <sup>3</sup> )=N-P | -66,2                                               | -62,0               | -66,2                                   | -77,7                                             | -70,5               | -75,2                                   |
| (C <sub>4</sub> H <sub>3</sub> N <sup>2</sup> )=N-P | -64,4                                               | -60,3               | -61,6                                   | -71,5                                             | -65,1               | -68,0                                   |
| (C <sub>4</sub> H <sub>3</sub> N <sup>3</sup> )=N-P | -67,0                                               | -62,3               | -64,2                                   | -78,4                                             | -71,6               | -74,2                                   |

|                                                      |       |       |       |       |       |       |
|------------------------------------------------------|-------|-------|-------|-------|-------|-------|
| $(\text{Me}_3\text{Si})_2\text{C}=\text{N}-\text{P}$ | -64,2 | -61,8 | -67,3 | -81,7 | -74,5 | -79,3 |
|------------------------------------------------------|-------|-------|-------|-------|-------|-------|

Correlation between the isodesmic reactions ( $\text{MP2/6-31G}^*/\text{B3LYP/6-311}+\text{G}^{**}$  in kcal/mol)

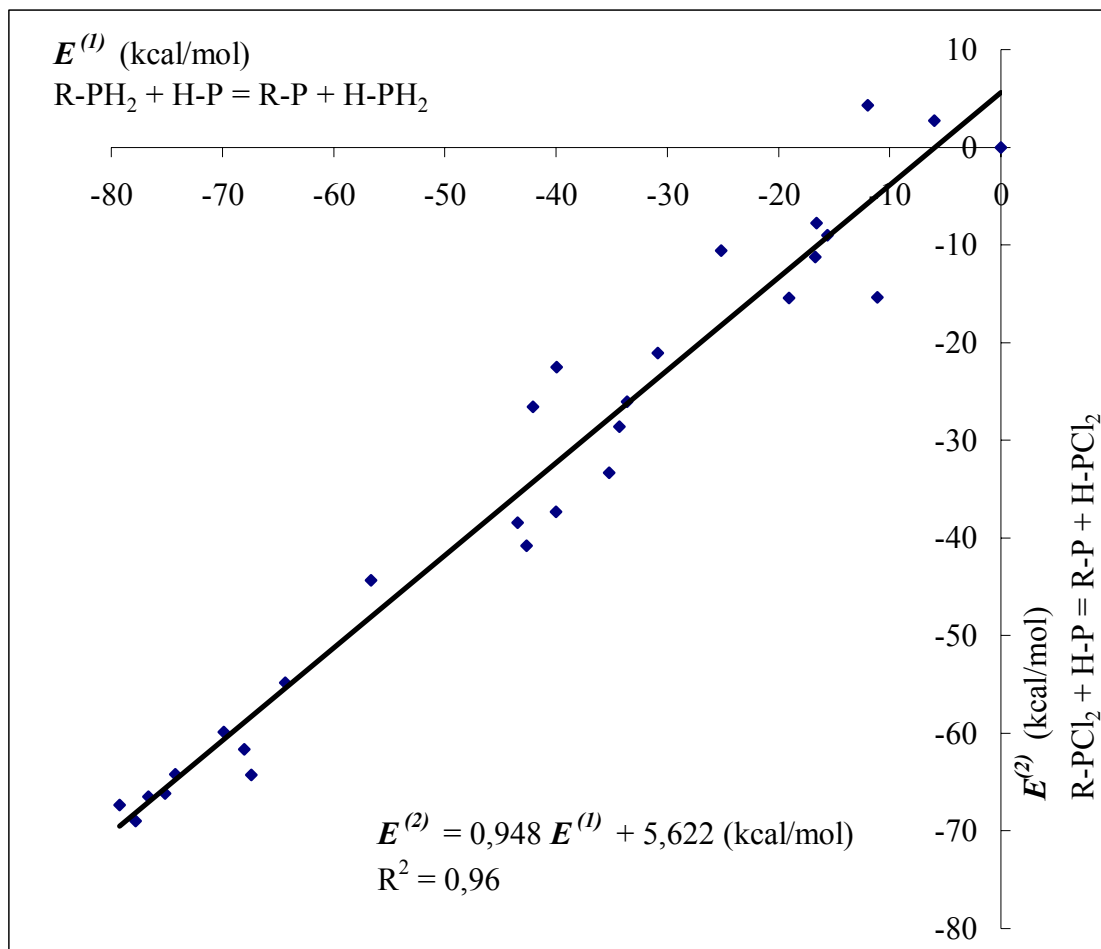

*Singlet triplet splitting (in kcal/mol) at different levels of theory*

|                                                     | E <sub>(T-S)</sub> |           |                                                  | RHF → UHF<br>instability<br>(at B3LYP/<br>6-311+G**) |
|-----------------------------------------------------|--------------------|-----------|--------------------------------------------------|------------------------------------------------------|
|                                                     | 3-21G*             | 6-311+G** | CCSD(T)/<br>aug-cc-pVDZ//<br>B3LYP/6-<br>311+G** |                                                      |
| H-P                                                 | -33,8              | -32,0     | -30,1                                            | +                                                    |
| F-P                                                 | -30,3              | -30,6     | -29,6                                            | +                                                    |
| Cl-P                                                | -29,3              | -28,6     | -28,1                                            | +                                                    |
| Br-P                                                | -27,9              | -27,7     | -27,6                                            | +                                                    |
| HO-P                                                | -17,0              | -18,7     | -19,1                                            | +                                                    |
| HS-P                                                | -7,4               | -8,4      | -10,0                                            | +                                                    |
| H <sub>2</sub> N-P                                  | 0,9                | -1,3      | -2,3                                             | +                                                    |
| F <sub>2</sub> N-P                                  | 12,7               | 10,4      | 3,7                                              | -                                                    |
| (C <sub>4</sub> H <sub>4</sub> N)-P                 | -9,4               | -9,5      | -10,4                                            | +                                                    |
| H <sub>2</sub> P-P                                  | -0,6               | -1,9      | -5,3                                             | -                                                    |
| F <sub>2</sub> P-P                                  | 10,3               | -0,2      | -2,7                                             | -                                                    |
| CH <sub>2</sub> =P-P                                | -7,3               | -8,5      | -9,5                                             | -                                                    |
| F <sub>2</sub> B-P                                  | -20,6              | -19,4     | -20,8                                            | +                                                    |
| H <sub>3</sub> C-P                                  | -30,9              | -28,8     | -29,2                                            | +                                                    |
| Ph-P                                                | -23,4              | -22,3     | -31,4                                            | +                                                    |
| HC≡CP                                               | -25,1              | -23,5     | -24,6                                            | +                                                    |
| H <sub>2</sub> C=N-P                                | 17,2               | 13,5      | 10,0                                             | -                                                    |
| F <sub>2</sub> C=N-P                                | -2,8               | -5,1      | -10,1                                            | -                                                    |
| (NC) <sub>2</sub> C=N-P                             | 21,9               | 19,3      | 19,0                                             | -                                                    |
| (H <sub>3</sub> Si) <sub>2</sub> C=N-P              | 27,8               | 24,1      | 22,1                                             | -                                                    |
| (C <sub>3</sub> H <sub>2</sub> )=N-P                | 1,1                | -3,2      | -7,5                                             | -                                                    |
| (C <sub>5</sub> H <sub>4</sub> )=N-P                | 22,3               | 18,9      | 16,7                                             | -                                                    |
| (C <sub>4</sub> H <sub>3</sub> P <sup>2</sup> )=N-P | 26,0               | 22,3      | 23,0                                             | -                                                    |
| (C <sub>4</sub> H <sub>3</sub> P <sup>3</sup> )=N-P | 22,5               | 19,1      | 18,5                                             | -                                                    |
| (C <sub>4</sub> H <sub>3</sub> N <sup>2</sup> )=N-P | 22,1               | 18,4      | 16,0                                             | -                                                    |
| (C <sub>4</sub> H <sub>3</sub> N <sup>3</sup> )=N-P | 25,4               | 21,6      | 20,3                                             | -                                                    |

|                                                      |      |      |      |   |
|------------------------------------------------------|------|------|------|---|
| $(\text{Me}_3\text{Si})_2\text{C}=\text{N}-\text{P}$ | 27,4 | 24,7 | 25,4 | - |
|------------------------------------------------------|------|------|------|---|

*Correlation between the isodesmic reaction energies (in kcal/mol) and the singlet-triplet splitting values (in kcal/mol)*

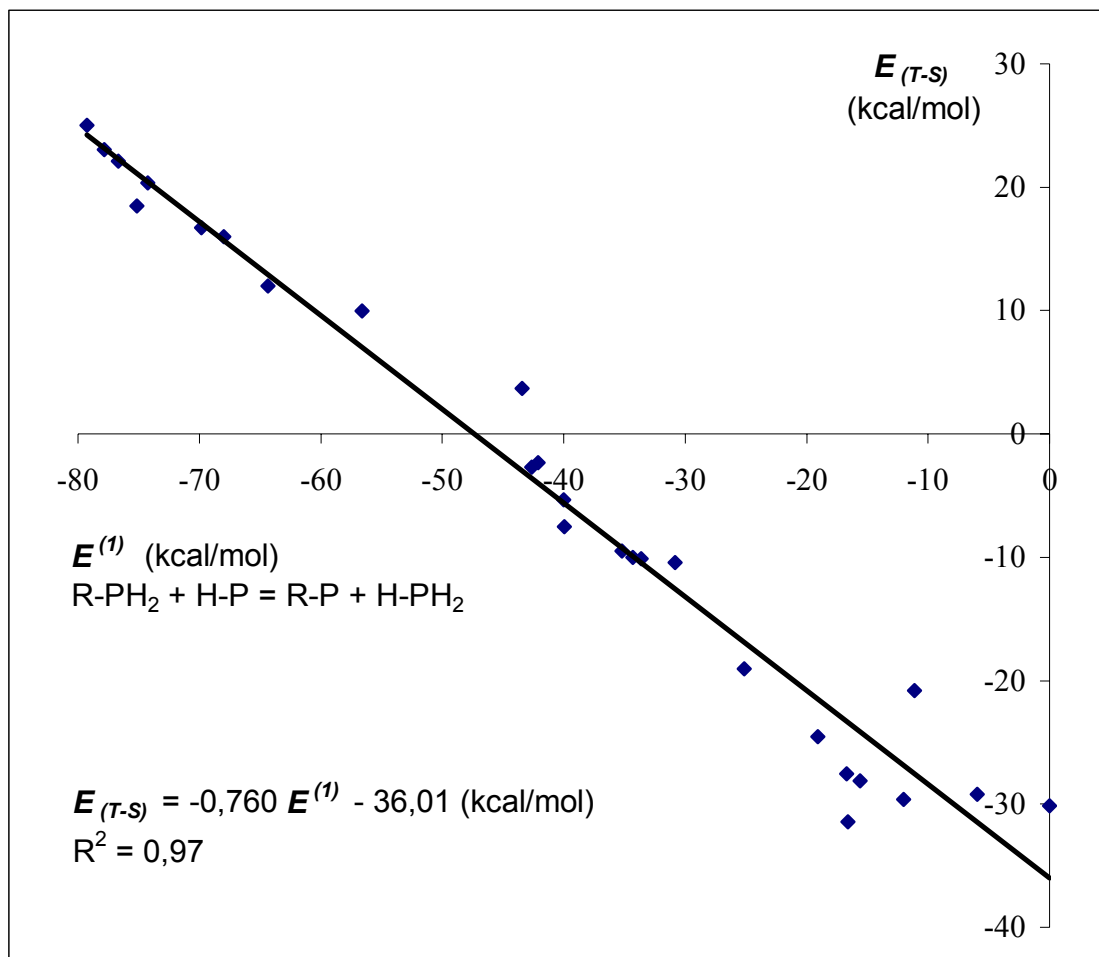



*Bond lengths (PN and CN in Å), electron densities ( $\rho$  in a. u.) and ellipticities ( $\epsilon$ ) at the critical points and Wiberg indices for the PN and CN bonds in the  $R'_2C=N-P$  phosphinidenes (B3LYP/6-311+G\*\*)*

|                                                      | PN bond |        |            |              | CN bond |        |            |              |
|------------------------------------------------------|---------|--------|------------|--------------|---------|--------|------------|--------------|
|                                                      | PN      | $\rho$ | $\epsilon$ | Wiberg index | CN      | $\rho$ | $\epsilon$ | Wiberg index |
| <b>H<sub>2</sub>P-NH<sub>2</sub></b>                 | 1,723   | 0,158  | 0,008      | 0,910        |         |        |            |              |
| <b>HP=NH (E)</b>                                     | 1,587   | 0,202  | 0,238      | 1,843        |         |        |            |              |
| <b>HP=NH (Z)</b>                                     | 1,576   | 0,204  | 0,247      | 1,831        |         |        |            |              |
| <b>P≡N</b>                                           | 1,489   | 0,239  | 0,000      | 2,778        |         |        |            |              |
| <b>H<sub>2</sub>C=N-P</b>                            | 1,546   | 0,190  | 0,072      | 1,688        | 1,286   | 0,337  | 0,343      | 1,533        |
| <b>F<sub>2</sub>C=N-P</b>                            | 1,576   | 0,178  | 0,200      | 1,401        | 1,246   | 0,385  | 0,790      | 1,571        |
| <b>(NC)<sub>2</sub>C=N-P</b>                         | 1,518   | 0,202  | 0,077      | 1,809        | 1,315   | 0,322  | 0,519      | 1,298        |
| <b>(H<sub>3</sub>Si)<sub>2</sub>C=N-P</b>            | 1,538   | 0,193  | 0,038      | 1,771        | 1,294   | 0,325  | 0,177      | 1,459        |
| <b>(C<sub>3</sub>H<sub>2</sub>)=N-P</b>              | 1,581   | 0,175  | 0,108      | 1,450        | 1,250   | 0,370  | 0,290      | 1,556        |
| <b>(C<sub>5</sub>H<sub>4</sub>)=N-P</b>              | 1,527   | 0,199  | 0,041      | 1,801        | 1,301   | 0,326  | 0,208      | 1,356        |
| <b>(Me<sub>3</sub>Si)<sub>2</sub>C=N-P</b>           | 1,546   | 0,189  | 0,033      | 1,736        | 1,288   | 0,329  | 0,129      | 1,497        |
| <b>(C<sub>4</sub>H<sub>3</sub>P<sup>2</sup>)=N-P</b> | 1,523   | 0,200  | 0,032      | 1,826        | 1,302   | 0,324  | 0,143      | 1,358        |
| <b>(C<sub>4</sub>H<sub>3</sub>P<sup>3</sup>)=N-P</b> | 1,522   | 0,201  | 0,033      | 1,829        | 1,312   | 0,319  | 0,182      | 1,303        |
| <b>(C<sub>4</sub>H<sub>3</sub>N<sup>2</sup>)=N-P</b> | 1,521   | 0,202  | 0,045      | 1,822        | 1,306   | 0,326  | 0,269      | 1,317        |
| <b>(C<sub>4</sub>H<sub>3</sub>N<sup>3</sup>)=N-P</b> | 1,523   | 0,200  | 0,042      | 1,823        | 1,302   | 0,325  | 0,198      | 1,340        |
